1 **Tissue- and population-level microbiome analysis of the wasp spider**

2 ***Argiope bruennichi* identifies a novel dominant bacterial symbiont**

3 Monica M. Sheffer<sup>1\*</sup>, Gabriele Uhl<sup>1</sup>, Stefan Probst<sup>2,3</sup>, Tillmann Lueders<sup>4</sup>, Tim Urich<sup>5</sup>, Mia  
4 M. Bengtsson<sup>5\*</sup>

5

6 <sup>1</sup>Zoological Institute and Museum, University of Greifswald, 17489 Greifswald, Germany

7 <sup>2</sup>LOEWE-Center for Translational Biodiversity Genomics, Senckenberg Museum, 60325  
8 Frankfurt, Germany

9 <sup>3</sup>South African National Biodiversity Institute, National Zoological Gardens of South  
10 Africa, Pretoria 0001, South Africa

11 <sup>4</sup>Bayreuth Center of Ecology and Environmental Research, University of Bayreuth,  
12 95448 Bayreuth, Germany

13 <sup>5</sup>Institute of Microbiology, University of Greifswald, 17487 Greifswald, Germany

14

15 \*corresponding authors:

16 E-Mail: [monica.sheffer@uni-greifswald.de](mailto:monica.sheffer@uni-greifswald.de)

17 Zoological Institute and Museum, University of Greifswald, Loitzer Str. 26, 17489  
18 Greifswald, Germany

19 E-Mail: [mia.bengtsson@uni-greifswald.de](mailto:mia.bengtsson@uni-greifswald.de)

20 Institute of Microbiology, University of Greifswald, Felix-Hausdorff-Str. 8, 17487  
21 Greifswald, Germany

22

## 23 **Abstract**

24 **Background:** Recognition is growing that many ecological and evolutionary processes in  
25 animals are dependent upon microbial symbioses. Although there is much known about  
26 the ecology and evolution of spiders, the role of the microbiome in these processes  
27 remains mostly unknown. We conducted an exploratory study of the microbiome of a  
28 range-expanding spider, comparing between populations, individuals, and tissue types  
29 (leg, prosoma, hemolymph, book lungs, ovaries, silk glands, midgut, and fecal pellets).  
30 Our study is one of the very first to go beyond targeting known endosymbionts in  
31 spiders, and characterizes the total microbiome across different body compartments.

32 **Results:** The microbiome of the wasp spider *Argiope bruennichi* is dominated by a novel  
33 bacterial symbiont, which is highly abundant in every tissue type in spiders from  
34 geographically distinct populations, and also present in offspring. The novel symbiont is  
35 affiliated with the *Tenericutes*, but has low sequence identity (<85%) to all previously  
36 named taxa. Furthermore, the microbiome differs significantly between populations and  
37 individuals, but not between tissue types.

38 **Conclusions:** Low sequence identity to other bacteria suggests the novel symbiont  
39 represents a new bacterial clade, and its presence in offspring implies that it may be  
40 vertically transmitted. Our results shed light on the processes which shape microbiome  
41 differentiation in this species, and raise several questions about the implications of the  
42 novel dominant bacterial symbiont on the biology of its host.

## 43 **Keywords**

44 Microbiome, Symbiosis, Endosymbiont, Transmission, Range expansion, Araneae,  
45 Spiders, *Argiope bruennichi*, Invertebrate host, *Tenericutes*

## 46 **Background**

47 All multicellular life evolved from and with microbes. Consequently, the  
48 interactions between animals and microbes are not rare occurrences but rather  
49 fundamentally important aspects of animal biology, from development to systems  
50 ecology [1]. The holobiont, defined as a host and all of its symbionts, is considered as a  
51 unit of biological organization, upon which selection can act [2, 3]. The nature of the  
52 relationships between host and symbionts has been of intense interest in recent years;  
53 while some form obligatory, co-evolutionary symbioses [4–8], others are  
54 environmentally derived, and/or unstable and temporary [9, 10]. The collective of  
55 microbial symbionts and their environment within a certain host or tissue can also be  
56 referred to as a microbiome [11]. For example, the intensive research on the human  
57 microbiome of the last decade has shed light on many roles of the microbiome of  
58 different tissues in health and disease [12]. In addition, correlations have been found  
59 between the microbiome and a number of traits, across different levels of biological  
60 organization and states (from population-level [13] down to the level of tissue-specific  
61 microbiomes [12, 14], as well as across different age and disease states [15]).

62 A striking feature of the microbiomes of some hosts is the presence of microbial  
63 endosymbionts. Endosymbionts, which typically reside within the cells of their hosts,  
64 can play a major role in speciation in many organisms, through mechanisms such as  
65 assortative mating and reproductive isolation [16]. *Wolbachia* endosymbiont infections  
66 are highly prevalent in invertebrates [17, 18], where they can induce parthenogenesis,  
67 cause cytoplasmic incompatibility between uninfected and infected individuals, as well  
68 as affect host fecundity, fertility, and longevity [19, 20], and can affect the sex ratio of

69 host species via feminization of males and male killing [21–23]. Non-*Wolbachia*  
70 (endo)symbiotic bacteria can also manipulate host physiology and behavior in diverse  
71 ways, from increasing heat tolerance in aphids [24] to determining egg-laying site  
72 preference in *Drosophila melanogaster* [25].

73 The function of a symbiont within its host is often predictive of its location within  
74 tissues. *Wolbachia* infections are often specifically located in reproductive tissues, but  
75 can also be distributed widely throughout somatic cells, depending on the host species  
76 [26, 27]. Beyond *Wolbachia*, many studies on bacterial symbionts have focused on  
77 blood- and sap-feeding insects; these specialist feeders require symbionts within their  
78 digestive tissues to assist in utilization of their nutrient-poor diets [4, 28–35]. Therefore,  
79 endosymbiont, and thus microbiome composition, can vary widely between tissue types  
80 and organ systems.

81 Among arthropods, insects have been the primary focus of microbiome studies.  
82 In comparison, investigations into the microbiome of spiders are scarce but suggest that  
83 spiders host diverse assemblages of bacteria, some of which alter their physiology and  
84 behavior. In a survey of eight spider species from 6 different families, in which DNA  
85 (deoxyribonucleic acid) was extracted from the whole body, putative endosymbionts  
86 dominated the microbiome of all species [36]. The endosymbionts discovered (assumed  
87 by the authors to be endosymbionts of the spiders, not endosymbionts of their insect  
88 prey) were largely reproductive parasites, including *Wolbachia*, *Cardinium*, *Rickettsia*,  
89 *Spiroplasma*, and *Rickettsiella*, which corresponds to the findings on other spider  
90 species across families [37–39]. The non-endosymbiont bacterial taxa were typical  
91 insect gut microbes, which could be nutritional symbionts of the spiders or represent the

92 microbiome of prey the spiders consumed. As to the effect of endosymbionts on spider  
93 hosts, relatively little is known. *Wolbachia* has been shown to bias the sex ratio in the  
94 dwarf spider *Oedothorax gibbosus* [40], and *Rickettsia* infection changed the dispersal  
95 probability of another dwarf spider species, *Erigone atra* [41]. The abundance of  
96 *Rhabdochlamydia* was found to vary with population and with sex (higher infection rate  
97 in females than males) in *Oedothorax gibbosus* [39]. The studies mentioned above have  
98 focused on endosymbionts alone. It has not yet been investigated whether there are  
99 intraspecific differences in the total (endosymbiont and non-endosymbiont) microbial  
100 community between different spider populations, the composition of the microbiome in  
101 certain tissue types or whether there is vertical transmission of the microbiome in  
102 spiders.

103 *Argiope bruennichi* (Scopoli, 1772), an orb-weaving spider with a Palearctic  
104 distribution [42], is an ideal candidate for a pioneering microbiome study, given the  
105 wealth of knowledge that exists on the biology of the species and the genus *Argiope*  
106 [43]. It has been the subject of many studies due to a number of interesting traits, such  
107 as sexual dimorphism and sexual cannibalism (i.e. [44–46]), and its recent and rapid  
108 range expansion within Europe [42, 47–50]. Since spider dispersal behavior can also be  
109 affected by endosymbiont infection [41], and dispersal behavior influences the rate of  
110 range expansion, the microbiome might play a role in the rapid range expansion of *A.*  
111 *bruennichi*. Although some studies on *A. bruennichi* have used targeted approaches to  
112 look for specific reproductive parasites, finding none [38, 51], a holistic approach to  
113 investigating the microbiome of *A. bruennichi* has not been carried out to date. In the  
114 present study, we investigate the total bacterial community of *A. bruennichi* from

115 geographically distant but genetically similar populations in Germany and Estonia,  
116 asking the following questions: (1) does *A. bruennichi* possess a multi-species  
117 microbiome? (2) If so, are there population-level differences in the microbiome? (3) Are  
118 specific microbes localized in certain tissues? And (4) is the microbiome vertically  
119 transmitted?

## 120 **Results**

121 Illumina amplicon sequencing of the V4 region of the 16S SSU rRNA (small  
122 subunit ribosomal ribonucleic acid) gene of six adult spiders (eight tissue types each)  
123 and two spiderling samples from two locations resulted in 5.2 million reads with an  
124 arithmetic mean of 90,377 reads per sample (min = 711 max = 981,405). 86.8% of total  
125 raw reads passed quality filtering and chimera removal. Chimeras counted for less than  
126 0.5% of all reads. After removing samples with low sequencing depth (less than 4,000  
127 reads), and then sequences with high abundance in negative controls (more than 50  
128 reads in control samples), 1.77 million reads remained, with an average of 41,182 reads  
129 per sample (min = 477 max = 629,137). In total, post-filtering, 574 amplicon sequence  
130 variants (ASVs) were detected in the tissues and spider populations.

### 131 **A bacterial symbiont in *Argiope bruennichi***

132 The microbiome of *A. bruennichi* was dominated by a single ASV, making up  
133 84.56% of all filtered reads (Figure 1). This ASV had less than 85% identity to any  
134 sequence in the NCBI (National Center for Biotechnology Information) database. Long  
135 read sequencing of two samples generated a near full length 16S rRNA gene amplicon  
136 sequence corresponding to the dominant ASV which allowed us to further investigate  
137 the identity of this dominant symbiont (Table 1). All low-similarity matches originated

138 from environmental samples and uncultured microbes. There was no match to a named  
139 taxon, making it difficult to classify the sequence taxonomically. An exploratory gene  
140 tree (Figure 2) placed the sequence within the *Tenericutes*, which are gram negative,  
141 cell-associated bacteria, which have lost their cell walls [52]. We refer to this dominant  
142 unknown symbiont as DUSA (**D**ominant **U**nknown **S**ymbiont of *Argiope bruennichi*)  
143 henceforth.

144 After filtering, 573 additional ASVs were detected in the samples, the majority of  
145 which were assigned to seven bacterial classes: *Actinobacteria* (75 ASVs),  
146 *Alphaproteobacteria* (96 ASVs), Bacilli (60 ASVs), *Bacteroidia* (49 ASVs), *Clostridia* (84  
147 ASVs), *Gammaproteobacteria* (115 ASVs), and *Mollicutes* (3 ASVs). Details of the  
148 ASVs in these most abundant classes can be found in Additional File 1. ASVs with the  
149 highest abundance (more than 500 reads post-filtering), other than DUSA, were  
150 identified as the genera *Mesoplasma* (*Mollicutes*: *Entomoplasmatales*:  
151 *Entomoplasmataceae*), *Acinetobacter* (*Gammaproteobacteria*: *Pseudomonadales*:  
152 *Moraxellaceae*), *Micrococcus* (*Actinobacteria*: *Micrococcales*: *Micrococcaceae*),  
153 *Frigoribacterium* (*Actinobacteria*: *Micrococcales*: *Microbacteriaceae*), and *Alcaligenes*  
154 (*Gammaproteobacteria*: *Betaproteobacteriales*: *Burkholderiaceae*). Archaea were not  
155 detected.

156

157 **Table 1: Taxonomic Classification of DUSA**

|                                           | <b>GenBank NR Best match:</b> Taxonomy (Accession number): sequence identity %      | <b>GenBank Bacteria &amp; Archaea Best match:</b> Taxonomy (Accession number): sequence identity % | <b>Silva SSU 138 NR:</b> Phylum; Class; Order; Family: sequence identity %                  |
|-------------------------------------------|-------------------------------------------------------------------------------------|----------------------------------------------------------------------------------------------------|---------------------------------------------------------------------------------------------|
| <b>ASV V4 region (248bp)</b>              | Uncultured prokaryote clone Otu01661 (MG853790.1): <b>84.3%</b>                     | <i>Holdemania filiformis</i> strain J1-31B-1 (NR_029335.1): <b>79.92%</b>                          | <i>Firmicutes; Erysipelotrichia; Erysipelotrichales; Erysipelotrichaceae</i> : <b>78.7%</b> |
| <b>Near full-length 16S gene (1492bp)</b> | <i>Mycoplasma</i> sp. (ex <i>Biomphalaria glabrata</i> ) (CP013128.1): <b>82.3%</b> | <i>Spiroplasma eriocheiris</i> CCTCC M 207170 strain CRAB (NR_125517.1): <b>80.79%</b>             | <i>Tenericutes; Mollicutes; Entomoplasmatales; Spiroplasmataceae</i> : <b>79.2%</b>         |

158 **Table 1:** Best matches of the Dominant Unknown Symbiont of *Argiope bruennichi*  
 159 (DUSA) short and long amplicons in different databases. Results from BLASTN  
 160 searches against GenBank and from SILVA ACT analysis, as of October 2019.

161 **Tissue localization and population differentiation**

162 With DUSA excluded from the analysis, tissue types did not differ significantly in  
 163 microbiome community composition (PERMANOVA,  $R^2 = 0.180$ ,  $p = 0.366$ ). However,  
 164 microbiome community composition varied significantly between populations  
 165 (PERMANOVA,  $R^2 = 0.045$ ,  $p < 0.01$ ) and individuals (PERMANOVA,  $R^2 = 0.059$ ,  $p <$   
 166  $0.001$ ). The interaction between individual and population was also significant  
 167 (PERMANOVA,  $R^2 = 0.044$ ,  $p < 0.01$ ) (Figure 3).

168 With DUSA included in the analysis, the results were similar but p- and  $R^2$ -values  
 169 were slightly different: tissue type: PERMANOVA  $R^2 = 0.231$ ,  $p = 0.131$ ; population:  
 170 PERMANOVA  $R^2 = 0.039$ ,  $p < 0.1$ ; individual: PERMANOVA  $R^2 = 0.040$ ,  $p < 0.1$ ;  
 171 interaction of individual and population: PERMANOVA  $R^2 = 0.057$ ,  $p < 0.05$ .



## 172 **Vertical transmission**

173 Juvenile spider (spiderling) samples also hosted bacterial sequences; in fact,  
174 they were dominated by DUSA (Figure 1). Other bacterial classes made up less than  
175 6% of the filtered reads in spiderlings from Germany, and less than 0.001% of reads in  
176 spiderlings from Estonia.

## 177 **Discussion**

### 178 **An unknown symbiont dominates the *Argiope bruennichi* microbiome**

179 We have demonstrated that *A. bruennichi* spiders contain a multi-species  
180 microbiome, answering the first of our research questions. However, the *A. bruennichi*  
181 microbiome is dominated by an unknown symbiont sequence (DUSA). DUSA likely  
182 represents a novel bacterial clade, due to the low sequence identity to known taxa [53].  
183 A robust evolutionary placement is not possible without further genomic analysis;  
184 however, our gene tree suggests that it is likely a close relative or member of the  
185 *Tenericutes*. Due to this placement within the *Tenericutes*, DUSA may have similar  
186 attributes to other arthropod-associated symbionts in the phylum. The *Mollicutes*, a  
187 class within *Tenericutes*, contain a number of species known to be associated with  
188 arthropods. These mollicute species are generally endosymbiotic, and are vertically  
189 transmitted [54, 55]. Their effects on hosts are diverse: some are pathogenic [56], while  
190 others increase host fitness under parasitism [57], or form nutritional mutualisms via  
191 nutrient recycling [55]. In such close symbioses, the endosymbiont genomes usually  
192 evolve much faster than free-living species [58–61]. This tendency toward rapid  
193 evolution of endosymbionts may explain the low 16S rRNA sequence similarity to other

194 bacteria in the database and would suggest that DUSA forms a close relationship, such  
195 as endosymbiosis, with the spider host.

196         Of the three mollicute ASVs detected in our samples, two were assigned to the  
197 genus *Spiroplasma*, but were detected in very low abundance. The third was assigned  
198 to the genus *Mesoplasma*, and was the second-most abundant ASV in our study. It was  
199 only found to be abundant in German spiders, and primarily in midgut and fecal pellet  
200 samples from a single individual. If this *Mesoplasma* ASV would be a facultative  
201 nutritional symbiont of the spider (i.e. [54, 55] for *Mesoplasma* in insects), we would  
202 expect it to be present in most investigated members of a species or population.  
203 Alternatively, it could be a symbiont of the spider prey, which is more likely since  
204 *Mesoplasma* and its relatives are very common symbionts of insects [37, 54, 55, 62,  
205 63]. Considering that *Mesoplasma* was found only in the midgut and fecal pellets, it can  
206 be assumed that it is prey-derived and its presence within the host is transient.

207 **The *Argiope bruennichi* microbiome varies between individuals and populations,**  
208 **but not between tissues**

209         Our analysis of the microbial community composition of tissue types, individuals,  
210 and populations shows that there is high variability between all samples. Because the *A.*  
211 *bruennichi* microbiome is dominated by DUSA, the other ASVs had lower sequencing  
212 coverage, which could contribute to the variability. Despite this, we found significant  
213 differences between individuals and between populations, thereby answering our  
214 second research question. It could be that the microbiome (excluding DUSA) of these  
215 spiders is transient and taken up from the environment, and especially from their diet,  
216 as is the case in some insects [9]. For instance, across many butterfly species, the

217 larval microbiome largely reflects the microbiome of the food plant's leaves [10]. To test  
218 the hypothesis of a partly prey derived microbiome for *A. bruennichi*, future studies  
219 could sequence both the microbial and prey communities, by combining the methods  
220 used in our study with gut content sequencing, as described in [64]. Different prey  
221 communities between populations and individuals (at the time of sampling) could lead to  
222 the differences observed in our study.

223 We found no significant differences in the microbial community between tissue  
224 types, with or without DUSA included in the analysis, addressing our third research  
225 question. Although endosymbiont infections are often localized within reproductive  
226 tissues, which could lead to tissue differentiation [26, 27], infection of somatic tissues  
227 may facilitate horizontal transfer of a symbiont: through feces, as in the Triatomid bug  
228 vectors of Chagas' disease [65], or to parasites, as in the case of a *Nasonia* wasp and  
229 its fly host [66]. There are also cases of symbionts that live primarily in insect  
230 hemolymph and are thus found in all tissues [67, 68]. Tissue differentiation could also  
231 arise in the presence of nutritional symbionts in the gut of a host, but no study has  
232 explicitly tested this in spiders. Additionally, there are no reported cases of nutritional  
233 symbionts in spiders. If there are differences between organ systems in *A. bruennichi*,  
234 they are too subtle be detected with the current sample size.

### 235 **Evidence of vertical transmission of DUSA?**

236 We analyzed the microbiome of spiderlings to address our fourth research  
237 question, whether the microbiome of *A. bruennichi* is vertically transmitted. Our data  
238 suggest that at least DUSA is indeed vertically transmitted. Spiderling samples  
239 contained a high abundance of DUSA reads, and few other ASVs. Spiderlings could

240 recruit bacteria from the environment or from their mothers via different avenues.  
241 Environmental colonization could possibly occur before or after the closing of the silken  
242 egg sac, in the moments between oviposition and encasement in silk, or by passing  
243 through the tough outer case (see Methods section for a description of *A. bruennichi*  
244 egg sac components). We consider these environmental avenues to be unlikely, given  
245 the extremely short amount of time that the eggs are exposed to the environment before  
246 encasement (M.M. Sheffer, G. Uhl, personal observation), and because *A. bruennichi*  
247 egg sac silk is extremely dense and egg sac silk of other spider species has been  
248 shown to inhibit growth of bacteria [69]. Vertical transmission of bacteria from mother to  
249 offspring could occur while the eggs are in the ovaries, or by deposition during the egg-  
250 laying process. We consider vertical transmission to be the most likely avenue for  
251 bacterial presence within spiderling tissue, supported by the low diversity of bacteria  
252 found in spiderling samples, and the presence of DUSA in female ovaries. Whether  
253 transmission occurs before or after egg laying could be tested using fluorescence in situ  
254 hybridization to visualize DUSA in or on eggs.

### 255 **Implications for future studies of *Argiope bruennichi* and beyond**

256 The presence of an endosymbiont might explain the incongruence between  
257 mitochondrial and nuclear DNA markers found by a study investigating the  
258 phylogeographic history of *A. bruennichi* [42]. The authors offered three possible  
259 explanations for this result: male-biased dispersal, selection on mitochondria, or  
260 reproductive parasites (e.g. *Wolbachia* spp.). The authors considered the last  
261 explanation the least likely, as no previous study had identified *Wolbachia* spp. or other  
262 reproductive parasites in *A. bruennichi* [37, 42, 51]. However, these studies targeted a

263 handful of known reproductive parasites using specific primers and PCR (polymerase  
264 chain reaction) assays [37, 51], which excluded the possibility of discovering any novel  
265 symbionts. Given our discovery of DUSA, the hypothesis that infection with reproductive  
266 parasites caused incongruence between molecular markers in *A. bruennichi* should be  
267 revisited. To that end, future efforts should focus on characterizing DUSA, for example  
268 by in-depth genomic analysis to determine its phylogenetic placement, as well as by  
269 exploring its distribution across the host species' range and its localization and functions  
270 inside the host. Further investigation could illuminate whether the relationship between  
271 *A. bruennichi* and DUSA is pathogenic, commensal, or mutualistic. Importantly, the  
272 presence and/or absence of DUSA in other spider or insect species should be explored,  
273 perhaps thereby providing clues into the origin of this novel symbiosis.

274         Our study adds to a growing body of literature suggesting that bacterial  
275 symbionts, especially endosymbionts, play an important role in spider biology. Two  
276 other recent studies that surveyed the microbiomes of several spider species found  
277 putative endosymbiotic taxa to be both prevalent (70% of surveyed individuals [70]) and  
278 dominant within certain hosts (>90% of bacterial reads [36, 71]). We demonstrate in  
279 addition that spiders are a source of novel symbiont taxa, which make them interesting  
280 targets for discoveries of new types of symbiotic interactions that may impact host  
281 biology in yet unimaginable ways. Several unique aspects of spider biology make them  
282 particularly exciting for studying symbiosis. For example, their predatory lifestyle offers  
283 ample opportunities for symbiont taxa from their prey to enter the spider host, in some  
284 cases giving rise to new stable associations. In addition, spiders employ external  
285 digestion by secreting digestive fluids into their prey, which sets them apart from the

286 internal digestive systems of most insect hosts that have until now been the subject of  
287 (endo)symbiosis research. For now, the implications of these peculiarities for symbiotic  
288 interactions between spiders and bacteria is uncharted territory, opening up promising  
289 new research avenues on symbiosis.

## 290 **Conclusion**

291 Our study is the first to look into the localization of microbial symbionts in spider  
292 tissues. The principle discovery is that of a novel symbiont, which was found to  
293 dominate the microbiome of all individuals and tissue types investigated. Its  
294 characteristics, such as low sequence identity to other bacteria and possible vertical  
295 transmission, suggest that it may belong to a novel clade of bacterial endosymbionts,  
296 with a tight association to its host. Although inference is limited by sample size, our  
297 findings highlight the need for more holistic microbiome studies across many organisms,  
298 which will increase our knowledge of the diversity of symbiotic relationships.

## 299 **Methods**

### 300 **Sample collection**

301 For this study, mature female *Argiope bruennichi* were collected for two  
302 purposes: first, for dissection into different tissue types, and second, to produce  
303 offspring. The females used for dissection came from two sites: one in Germany  
304 (Greifswald: 54.11 N, 13.48 E; n = 3), and one site in Estonia (Pärnu: 58.30 N, 24.60 E;  
305 n = 3). The females which produced offspring came from two sites (Plech, Germany:  
306 49.65 N, 11.47 E; n = 1; Pärnu, Estonia: 58.30 N, 24.60 E; n = 1) and were maintained  
307 in the lab until they produced an egg sac. It is important to note that *A. bruennichi*  
308 females lay their eggs into a simple egg sac, which is then wrapped in a silk casing

309 consisting of two layers: one “fluffy” silk layer, and one tough outer layer [72]. Eggs  
310 hatch within the first weeks, but the juvenile spiders, “spiderlings,” remain in the egg sac  
311 for several months over winter [72]. The spiderlings, which hatched from the egg sacs  
312 produced in the lab, were preserved in the silk casing in the freezer until the day of DNA  
313 extraction for microbiome analysis.

#### 314 **Sample preparation**

315 Three adult specimens each from Greifswald and Pärnu were dissected within  
316 two days of collection, and the spiders were not fed between the point of collection and  
317 dissection. Before dissection, the spiders were anaesthetized using CO<sub>2</sub>, after which the  
318 prosoma and opisthosoma were separated using sterilized scissors. A 10 µl sample of  
319 hemolymph was immediately taken from the aorta at the point of separation with a  
320 sterile pipette. Next, the legs were removed and a single leg was taken as a sample and  
321 stored separately from the whole prosoma. Sterilized forceps were used for dissection  
322 of the opisthosoma. The cuticle was removed dorsally, and a sample of the midgut was  
323 taken from the dorsal side and stored. The cuticle was then cut ventrally, between the  
324 epigynum and the spinnerets. The two cuticular flaps were pulled to loosen the internal  
325 organs, and the digestive tubules were teased apart to reveal the rest of the organs.  
326 The major ampullate silk glands, which produce structural and dragline silk and are the  
327 largest and easiest to remove of all the silk glands [73–76], were removed and stored.  
328 Then, a sample of the ovaries was removed and stored. Removal of the ovaries  
329 revealed the cloaca, and existing fecal pellets and the surrounding fluid in the cloaca  
330 were sampled using a sterile pipette. Finally, the book lungs were removed and stored.

331 All tissue samples were stored in sterile tubes and frozen until the time of DNA  
332 extraction.

333 For the spiderling samples, one egg sac each from Plech and Pärnu was opened  
334 with sterilized forceps, and 5 spiderlings were placed directly into phenol-chloroform for  
335 DNA extraction.

### 336 **DNA Extraction and Illumina Amplicon Sequencing**

337 DNA was extracted from tissue samples using a phenol-chloroform extraction  
338 protocol, as described in [77]. Mechanical lysis was performed via bead beating in a  
339 FastPrep 24 5G (MP Biomedicals) with FastPrep Lysing Matrix E. A fragment of the 16S  
340 rRNA gene was amplified from the extracted DNA with a primer pair recommended by  
341 the Earth Microbiome Project, targeting the V4 region of the 16S rRNA gene [515f: 50-  
342 GTGYCAGCMGCCGCGGTAA-30, 806r: 50-GGACTACNVGGGTWTCTAAT-30 [78]]  
343 coupled to custom adaptor-barcode constructs. PCR amplification and Illumina MiSeq  
344 library preparation and sequencing (V3 chemistry) was carried out by LGC Genomics in  
345 Berlin. Sequences have been submitted to the NCBI short read archive, and can be  
346 found under the BioProject number PRJNA577547, accession numbers  
347 SAMN13028533- SAMN13028590.

348 In addition, PacBio long-read SMRT (single molecule real-time) sequencing of  
349 almost full-length 16S rRNA gene amplicons was performed for two of the samples (a  
350 prosoma extract from a German spider and a spiderling extract from Estonian  
351 spiderlings). For this, ~1500 bp amplicons were amplified using the primers Ba27f  
352 (AGAGTTTGATCMTGGCTCAG), and Ba1492r (CGGYTACCTTGTTACGACTT) tailed  
353 with PacBio universal sequencing adapters (universal tags) in a first round of PCR with



354 25 cycles. After PCR product purification, a second round of PCR was done with distinct  
355 barcoded universal F/R primers as provided by the manufacturer (PacBio, Menlo Park,  
356 CA). SMRTbell Library preparation and SMRT sequencing on a PacBio Sequel System  
357 was also done according to manufacturer instructions. Approximately 20 barcoded  
358 amplicons were multiplexed per SMRT cell. Initial processing of SMRT reads and  
359 exporting of CCS (circular consensus sequencing) data was done with the SMRT Link  
360 analysis software as recommended by the manufacturer. Raw reads are available on  
361 the NCBI short read archive, and can be found under the BioProject number  
362 PRJNA577547, accession number SAMN13046638.

363 The resulting sequences were clustered and consensus sequences derived  
364 using IsoCon [79]. The DUSA sequence was identified by comparing the short V4  
365 amplicon with the SMRT IsoCon consensus sequences and choosing the sequence  
366 with the highest match.

### 367 **Sequence Processing**

368 Sequences clipped from adaptor and primer sequence remains were received  
369 from the LGC Genomics sequencing facility, and then processed using the DADA2  
370 (Divisive Amplicon Denoising Algorithm 2) package in R [Version 1.6.0 [80]] [81]. The R  
371 script used for sequence processing can be found in Additional File 2. Forward and  
372 reverse Illumina reads were simultaneously filtered and truncated to 200 bp. Error rates  
373 were estimated using the maximum possible error estimate from the data as a first  
374 guess. Sample sequences were de-multiplexed and unique sequences were inferred  
375 using the core denoising algorithm in the DADA2 R package. Following sample  
376 inference, paired forward and reverse reads were merged. Chimeric sequences

377 accounted for less than 0.5% of the total sequence reads and were removed using the  
378 removeBimeraDenovo function. Taxonomic classification was performed using the  
379 DADA2 package's implementation of the RDP's naïve Bayesian classifier [82], with a  
380 minimum bootstrap confidence of 50, drawing from the Silva database [83]. The  
381 resulting unique amplicon sequence variants (ASVs) with taxonomic classification were  
382 used to build a table containing relative abundances of ASVs across all samples.

### 383 **Data Analysis and Visualization**

384 To control for possible contamination during the process of extraction and  
385 sequencing, given low DNA yield from some tissue types, a control extraction using  
386 sterile water was performed alongside each extraction. These negative controls were  
387 included in the sequencing run. A series of cutoffs were employed as quality control on  
388 the relative abundance table. First, samples with low sequencing depth (less than 4000  
389 reads) were removed. Then, the data was strictly filtered to remove any ASVs found in  
390 extraction blanks (with an abundance of 50 reads or more). After the removal of those  
391 possible contaminants, another sequencing depth cutoff was enforced, removing  
392 samples with less than 400 reads.

393 ASVs were aggregated by bacterial class to obtain an overview of the  
394 microbiome. Low-abundance classes (less than 1000 reads total, meaning less than  
395 0.1% of filtered reads) were aggregated into a category called "Other." The relative  
396 abundance of each class was then visualized in the form of pie charts using the ggplot2  
397 package [84] in R.

398 To test for and visualize dissimilarity in ASV composition between tissue types,  
399 sampling sites and individuals, non-metric multidimensional scaling was performed on

400 Hellinger-transformed sequence variant counts using Bray-Curtis distance, implemented  
401 in the vegan package (vegan function 'metaMDS') [version 2.5-1 [85]] in R. Explanatory  
402 power of tissue type, sampling site, and individual was calculated using a PERMANOVA  
403 test (vegan function 'adonis'). This analysis was done on filtered reads, once with the  
404 most dominant ASV (DUSA) excluded due to its overwhelming influence on the data,  
405 which might mask the patterns of the rest of the bacterial community, and once with  
406 DUSA included. The R script used for filtering, statistical analysis, and data visualization  
407 of the 16S amplicon sequences can be found in Additional File 3.

408         The almost-full length 16S rRNA gene sequence of DUSA generated by SMRT  
409 amplicon sequencing was compared to that of well-known endosymbiotic bacterial taxa  
410 retrieved from Silva and GenBank, along with two archaeal sequences as an outgroup.  
411 The sequences were aligned using ClustalW implemented in MEGA [86, 87], and a  
412 consensus tree was calculated using IQ-TREE [88] with 5000 bootstrap iterations. The  
413 consensus tree was visualized using FigTree [89]. For clarity of visualization, branches  
414 were collapsed by phylum for distant taxa and by genus for *Tenericutes*; for an un-  
415 collapsed tree of the *Tenericutes* and all accession numbers see Additional Files 4 and  
416 5.

417

## 418 **List of abbreviations**

419 ASV: Amplicon Sequence Variant

420 CCS: Circular Consensus Sequencing

421 DADA2: Divisive Amplicon Denoising Algorithm 2

422 DNA: Deoxyribonucleic Acid

423 DUSA: Dominant Unknown Symbiont of *Argiophe bruennichi*

424 NCBI: National Center for Biotechnology Information

425 PacBio: Pacific Biosciences

426 PCR: Polymerase Chain Reaction

427 rRNA: ribosomal Ribonucleic Acid

428 SMRT: Single Molecule Real-Time

429 SSU: Small Subunit

## 430 **Declarations**

### 431 **Ethics approval and consent to participate**

432 Not applicable.

### 433 **Consent for publication**

434 Not applicable.

### 435 **Availability of data and materials**

436 16S SSU rRNA and PacBio SMRT sequencing data are available at the NCBI Short

437 Read Archive, under the BioProject number PRJNA577547

438 (<https://www.ncbi.nlm.nih.gov/sra/PRJNA577547>).

439 The datasets generated and analyzed during the current study are available in online

440 repositories and as Additional Files; raw sequences can be downloaded at

441 <https://figshare.com/s/24d2c1ccc68637c5b519> and can be processed using the R script

442 included in this article (Additional File 2). The files generated post-sequence processing,  
443 which were used for statistical analysis and data visualization (using the R script in  
444 Additional File 3) can be downloaded at <https://figshare.com/s/dfc0b9ad60dbabd0e69b>.

#### 445 **Competing interests**

446 The authors declare that they have no competing interests.

#### 447 **Funding**

448 Funding for this study was provided by the Deutsche Forschungsgemeinschaft (DFG)  
449 as part of the Research Training Group 2010 RESPONSE.

#### 450 **Authors' contributions**

451 GU, MMB, and TU conceived of the study. MMS and GU collected and dissected the  
452 samples; MMS performed the laboratory work and drafted the manuscript. MMS and  
453 MMB performed the 16S SSU rRNA sequence processing and data analysis. TL and  
454 SP assisted MMS with the generation (TL) and analysis (SP) of the PacBio amplicon for  
455 the gene tree. All authors read, contributed to, and approved the final manuscript.

#### 456 **Acknowledgements**

457 We thank Susanne Kublik of the Microbiome Analysis Core Facility of the Helmholtz  
458 Zentrum München for her valuable expertise and support in SMRT sequencing, Philip  
459 O.M. Steinhoff for early comments on the manuscript, and Sebastian Petters for advice  
460 in the lab.

461

462 **Figures**

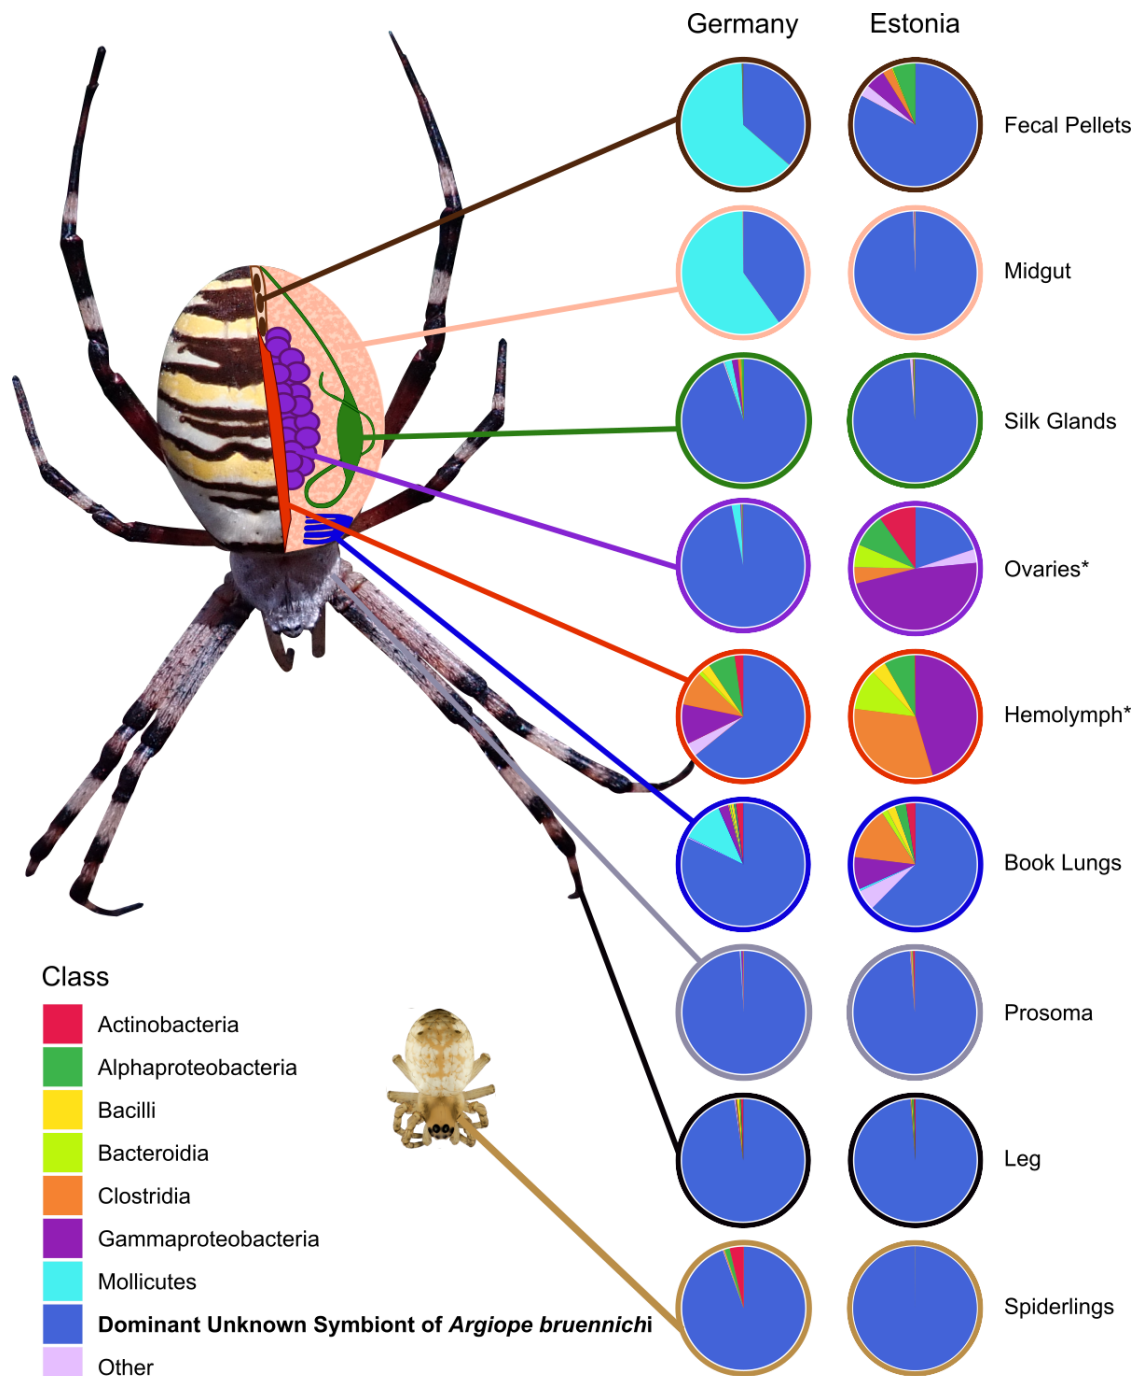

463

464 **Figure 1:** Microbiome composition of spider tissue types and spiderlings from Germany

465 and Estonia. Tissue types are represented in a schematic drawing of *Argiope bruennichi*

466 internal anatomy. 16S rRNA gene sequences were pooled by class; classes with low

467 abundance were combined into an “Other” category. The Dominant Unknown Symbiont  
468 (DUSA) is separated from other unknown sequences, which were of low abundance.  
469 Asterisks (\*) denote tissue types which had sample size lower than 2 (Estonia Ovaries:  
470 n = 1, Estonia Hemolymph: n=1) due to problems with extraction.

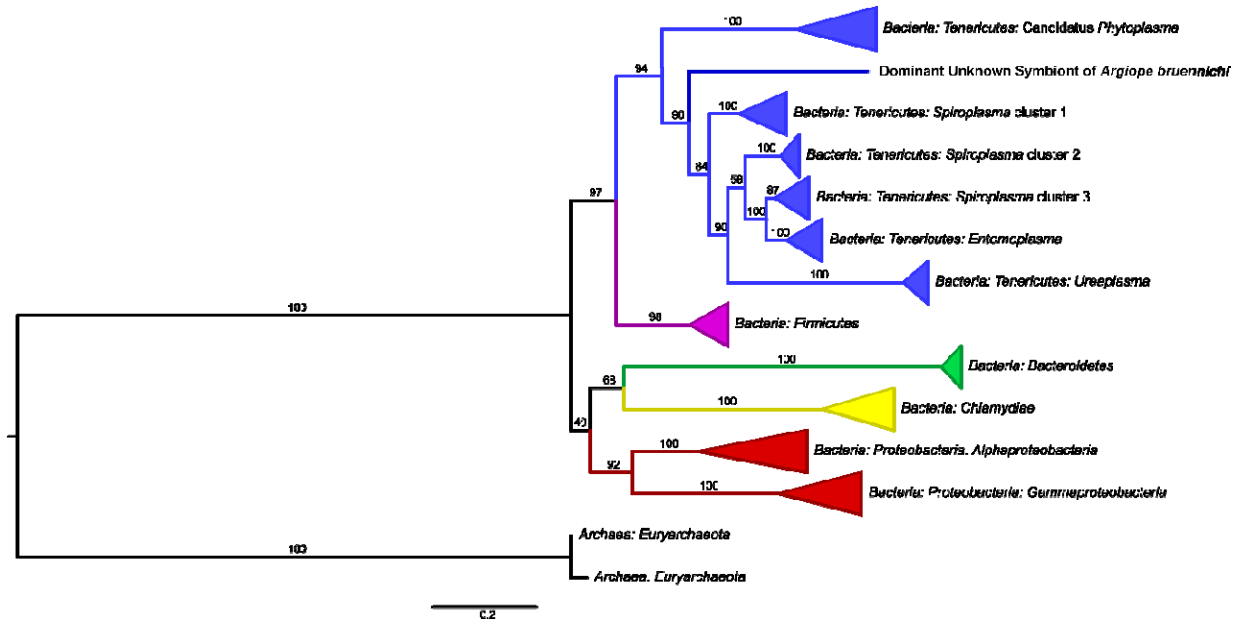

472 **Figure 2:** Gene tree placing DUSA relative to endosymbiotic taxa, based on alignment  
473 of 16S rRNA gene sequences obtained from Silva and GenBank. Branch labels  
474 represent bootstrap support; branches were collapsed by phylum for taxa distantly  
475 related to DUSA and by genus for taxa within the *Tenericutes*. For all accession  
476 numbers see Additional File 4, and for an un-collapsed tree of the *Tenericutes*, see  
477 Additional File 5.

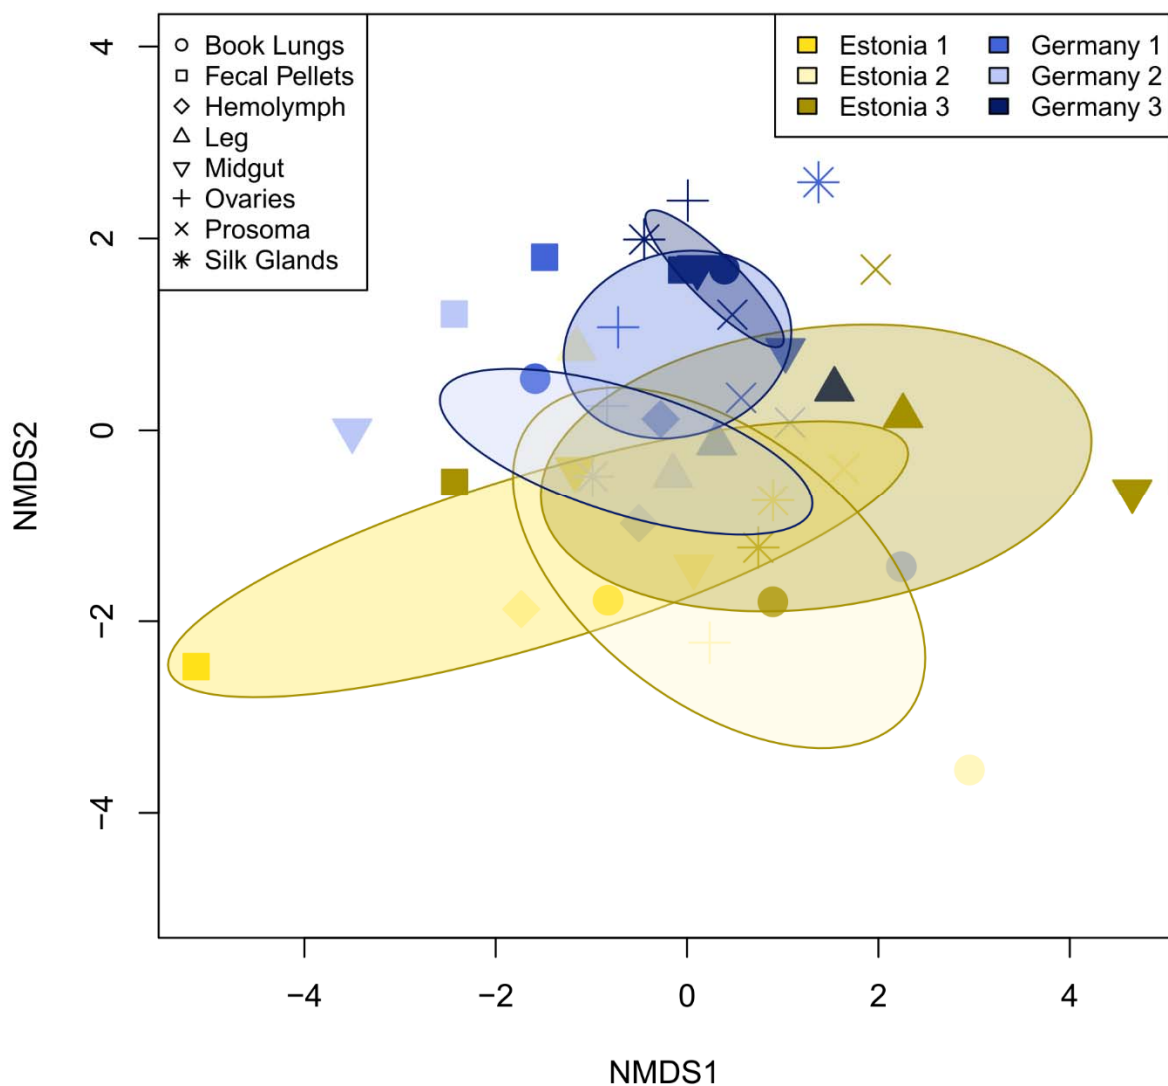

478

479 **Figure 3:** nMDS ordination based on 16S rRNA gene sequence variant relative

480 abundance reveals the slight, but significant, differentiation of the *Argiope bruennichi*

481 bacterial community composition according to population (Estonia or Germany in the

482 legend) and individual (denoted by number in the legend), as well as the interaction

483 between the two. Single points represent sequenced tissue samples, and the shape of

484 the point represents the tissue type; shared color denotes tissue samples taken from a



485 single individual spider. Shades of yellow represent spiders collected from Estonia,  
486 while shades of blue represent spiders collected from Germany. Ellipses represent the  
487 99% confidence interval, based on standard error.  
488

## 489 **References**

- 490 1. McFall-Ngai M, Hadfield MG, Bosch TCG, Carey H V., Domazet-Lošo T, Douglas AE, et al.  
491 Animals in a bacterial world, a new imperative for the life sciences. Proc Natl Acad Sci.  
492 2013;110:3229–36.
- 493 2. Margulis L, Fester R. Symbiosis as a source of evolutionary innovation □: speciation and  
494 morphogenesis. MIT Press; 1991.
- 495 3. Bordenstein SR, Theis KR. Host biology in light of the microbiome: Ten principles of  
496 holobionts and hologenomes. PLoS Biol. 2015;13:e1002226.
- 497 4. Baumann P, Baumann L, Lai C-Y, Rouhbakhsh D, Moran NA, Clark MA. Genetics,  
498 physiology, and evolutionary relationships of the genus *Buchnera*: intracellular symbionts of  
499 aphids. Annu Rev Microbiol. 1995;49:55–94.
- 500 5. Douglas AE. Reproductive failure and the free amino acid pools in pea aphids (*Acyrtosiphon*  
501 *pisum*) lacking symbiotic bacteria. J Insect Physiol. 1996;42:247–55.
- 502 6. Wilkinson TL, Koga R, Fukatsu T. Role of host nutrition in symbiont regulation: Impact of  
503 dietary nitrogen on proliferation of obligate and facultative bacterial endosymbionts of the pea  
504 aphid *Acyrtosiphon pisum*. Appl Environ Microbiol. 2007;73:1362–6.
- 505 7. Brinza L, Viñuelas J, Cottret L, Calevro F, Rahbé Y, Febvay G, et al. Systemic analysis of the  
506 symbiotic function of *Buchnera aphidicola*, the primary endosymbiont of the pea aphid  
507 *Acyrtosiphon pisum*. C R Biol. 2009;332:1034–49.
- 508 8. Burstein D, Sun CL, Brown CT, Sharon I, Anantharaman K, Probst AJ, et al. Major bacterial  
509 lineages are essentially devoid of CRISPR-Cas viral defence systems. Nat Commun.  
510 2016;7:10613.
- 511 9. Engel P, Moran NA. The gut microbiota of insects – diversity in structure and function. FEMS  
512 Microbiol Rev. 2013;37:699–735.
- 513 10. Hammer TJ, Janzen DH, Hallwachs W, Jaffe SP, Fierer N. Caterpillars lack a resident gut

- 514 microbiome. Proc Natl Acad Sci U S A. 2017;114:9641–6.
- 515 11. Marchesi JR, Ravel J. The vocabulary of microbiome research: a proposal. Microbiome.  
516 2015;3:31.
- 517 12. Cho I, Blaser MJ. The human microbiome: at the interface of health and disease. Nat Rev  
518 Genet. 2012;13:260–70.
- 519 13. Nishijima S, Suda W, Oshima K, Kim S-W, Hirose Y, Morita H, et al. The gut microbiome of  
520 healthy Japanese and its microbial and functional uniqueness. DNA Res. 2016;23:125–33.
- 521 14. Ursell LK, Clemente JC, Rideout JR, Gevers D, Caporaso JG, Knight R. The interpersonal  
522 and intrapersonal diversity of human-associated microbiota in key body sites. J Allergy Clin  
523 Immunol. 2012;129:1204–8.
- 524 15. Shoemark DK, Allen SJ. The microbiome and disease: Reviewing the links between the oral  
525 microbiome, aging, and Alzheimer's disease. J Alzheimer's Dis. 2015;43:725–38.
- 526 16. Shropshire JD, Bordenstein SR. Speciation by symbiosis: The microbiome and behavior.  
527 MBio. 2016;7:e01785.
- 528 17. Kozek WJ, Rao RU. The discovery of *Wolbachia* in arthropods and nematodes - A historical  
529 perspective. Issues Infect Dis. 2007;5:1–14.
- 530 18. Werren JH, Windsor D, Guo L. Distribution of *Wolbachia* among neotropical arthropods.  
531 Proc R Soc B Biol Sci. 1995;262:197–204.
- 532 19. Bourtzis K, O'Neill SL. *Wolbachia* infections and arthropod reproduction. Bioscience.  
533 1998;48:287–93.
- 534 20. Werren JH, Baldo L, Clark ME. *Wolbachia*: master manipulators of invertebrate biology. Nat  
535 Rev Microbiol. 2008;6:741–51.
- 536 21. Hurst GD, Jiggins FM. Male-killing bacteria in insects: mechanisms, incidence, and  
537 implications. Emerg Infect Dis. 2000;6:329–36.
- 538 22. Engelstädter J, Hurst GDD. The impact of male-killing bacteria on host evolutionary  
539 processes. Genetics. 2007;175:245–54.

- 540 23. Stouthamer R, Breeuwer JAJ, Hurst GDD. *Wolbachia pipientis*: microbial manipulator of  
541 arthropod reproduction. *Annu Rev Microbiol.* 1999;53:71–102.
- 542 24. Montllor CB, Maxmen A, Purcell AH. Facultative bacterial endosymbionts benefit pea aphids  
543 *Acyrtosiphon pisum* under heat stress. *Ecol Entomol.* 2002;27:189–95.
- 544 25. Fischer C, Trautman EP, Crawford JM, Stabb E V, Handelsman J, Broderick NA. Metabolite  
545 exchange between microbiome members produces compounds that influence *Drosophila*  
546 behavior. *Elife.* 2017;6:e18855.
- 547 26. Dobson SL, Bourtzis K, Braig HR, Jones BF, Zhou W, Rousset F, et al. *Wolbachia* infections  
548 are distributed throughout insect somatic and germ line tissues. *Insect Biochem Mol Biol.*  
549 1999;29:153–60.
- 550 27. McGraw EA, O’Neill SL. *Wolbachia pipientis*: intracellular infection and pathogenesis in  
551 *Drosophila*. *Curr Opin Microbiol.* 2004;7:67–70.
- 552 28. Buchner P. Studien an intracellularen Symbionten V. die symbiontischen Einrichtungen der  
553 Zikaden. *Zeitschrift für Morphol und Ökologie der Tiere.* 1925;4:88–245.
- 554 29. Douglas AE. Nutritional interactions in insect-microbial symbioses: aphids and their  
555 symbiotic bacteria *Buchnera*. *Annu Rev Entomol.* 1998;43:17–37.
- 556 30. Shigenobu S, Watanabe H, Hattori M, Sakaki Y, Ishikawa H. Genome sequence of the  
557 endocellular bacterial symbiont of aphids *Buchnera sp.* APS. *Nature.* 2000;407:81–6.
- 558 31. Wu D, Daugherty SC, Van Aken SE, Pai GH, Watkins KL, Khouri H, et al. Metabolic  
559 complementarity and genomics of the dual bacterial symbiosis of sharpshooters. *PLoS Biol.*  
560 2006;4:1079–92.
- 561 32. Hosokawa T, Koga R, Kikuchi Y, Meng X-Y, Fukatsu T. *Wolbachia* as a bacteriocyte-  
562 associated nutritional mutualist. *Proc Natl Acad Sci U S A.* 2010;107:769–74.
- 563 33. Nikoh N, Hosokawa T, Moriyama M, Oshima K, Hattori M, Fukatsu T. Evolutionary origin of  
564 insect-*Wolbachia* nutritional mutualism. *Proc Natl Acad Sci U S A.* 2014;111:10257–62.
- 565 34. Van Leuven JT. The evolution of nutritional co-endosymbionts in cicadas. University of

- 566 Montana; 2015.
- 567 35. Rio RVM, Attardo GM, Weiss BL. Grandeur alliances: symbiont metabolic integration and  
568 obligate arthropod hematophagy. *Trends Parasitol.* 2016;32:739–49.
- 569 36. Zhang L, Yun Y, Hu G, Peng Y. Insights into the bacterial symbiont diversity in spiders. *Ecol*  
570 *Evol.* 2018;8:4899–906.
- 571 37. Duron O, Bouchon D, Boutin S, Bellamy L, Zhou L, Engelstädter J, et al. The diversity of  
572 reproductive parasites among arthropods: *Wolbachia* do not walk alone. *BMC Biol.* 2008;6:27.
- 573 38. Duron O, Hurst GDD, Horne EA, Josling JA, Engelstädter J. High incidence of the  
574 maternally inherited bacterium *Cardinium* in spiders. *Mol Ecol.* 2008;17:1427–37.
- 575 39. Vanthournout B, Hendrickx F. Endosymbiont dominated bacterial communities in a dwarf  
576 spider. *PLoS One.* 2015;10:e0117297.
- 577 40. Vanthournout B, Swaegers J, Hendrickx F. Spiders do not escape reproductive  
578 manipulations by *Wolbachia*. *BMC Evol Biol.* 2011;11:15.
- 579 41. Goodacre SL, Martin OY, Bonte D, Hutchings L, Woolley C, Ibrahim K, et al. Microbial  
580 modification of host long-distance dispersal capacity. *BMC Biol.* 2009;7:32.
- 581 42. Krehenwinkel H, Graze M, Rödder D, Tanaka K, Baba YG, Muster C, et al. A  
582 phylogeographical survey of a highly dispersive spider reveals eastern Asia as a major glacial  
583 refugium for Palaearctic fauna. *J Biogeogr.* 2016;43:1583–94.
- 584 43. Schneider J, Uhl G, Herberstein ME. Cryptic female choice within the genus *Argiope*: A  
585 comparative approach. In: Peretti A, Aisenberg A, editors. *Cryptic Female Choice in Arthropods:*  
586 *Patterns, Mechanisms and Prospects.* Cham: Springer International Publishing; 2015. p. 55–77.
- 587 44. Fromhage L, Uhl G, Schneider JM. Fitness consequences of sexual cannibalism in female  
588 *Argiope bruennichi*. *Behav Ecol Sociobiol.* 2003;55:60–4.
- 589 45. Schneider JM, Fromhage L, Uhl G. Extremely short copulations do not affect hatching  
590 success in *Argiope bruennichi* (Araneae, Araneidae). *J Arachnol.* 2005;33:663–9.
- 591 46. Welke KW, Schneider JM. Males of the orb-web spider *Argiope bruennichi* sacrifice

- 592 themselves to unrelated females. *Biol Lett.* 2010;6:585–8.
- 593 47. Guttman R. Zur Arealentwicklung und Ökologie der Wespenspinne (*Argiope bruennichi*) in  
594 der Bundesrepublik Deutschland und den angrenzenden Ländern (Araneae). *Bonner Zool*  
595 *Beiträge.* 1979;30:454–86.
- 596 48. Kumschick S, Fronzek S, Entling MH, Nentwig W. Rapid spread of the wasp spider *Argiope*  
597 *bruennichi* across Europe: a consequence of climate change? *Clim Change.* 2011;109:319–29.
- 598 49. Krehenwinkel H, Tautz D. Northern range expansion of European populations of the wasp  
599 spider *Argiope bruennichi* is associated with global warming-correlated genetic admixture and  
600 population-specific temperature adaptations. *Mol Ecol.* 2013;22:2232–48.
- 601 50. Krehenwinkel H, Rödder D, Tautz D. Eco-genomic analysis of the poleward range  
602 expansion of the wasp spider *Argiope bruennichi* shows rapid adaptation and genomic  
603 admixture. *Glob Chang Biol.* 2015;21:4320–32.
- 604 51. Yun Y, Peng Y, Liu F, Lei C. *Wolbachia* screening in spiders and assessment of horizontal  
605 transmission between predator and prey. *Neotrop Entomol.* 2011;40:164–9.
- 606 52. Brown DR. *Tenericutes*. In: *Bergey's Manual of Systematics of Archaea and Bacteria.*  
607 Chichester, UK: John Wiley & Sons, Ltd; 2018. p. 1–3.
- 608 53. Whitman WB, Bergey's Manual Trust. *Bergey's Manual of Systematics of Archaea and*  
609 *Bacteria.* 2015.
- 610 54. Tully JG, Rose DL, Carle P, Bove JM, Hackett KJ, Whitcomb RF. *Acholeplasma*  
611 *entomophilum* sp. nov. from gut contents of a wide range of host insects. *Int J Syst Bacteriol.*  
612 1988;38:164–7.
- 613 55. Sapountzis P, Zhukova M, Shik JZ, Schiott M, Boomsma JJ. Reconstructing the functions of  
614 endosymbiotic Mollicutes in fungus-growing ants. *Elife.* 2018;7:e39209.
- 615 56. Meeus I, Vercruyse V, Smaghe G. Molecular detection of *Spiroplasma apis* and  
616 *Spiroplasma melliferum* in bees. *J Invertebr Pathol.* 2012;109:172–4.
- 617 57. Xie J, Tiner B, Vilchez I, Mateos M. Effect of the *Drosophila* endosymbiont *Spiroplasma* on

- 618 parasitoid wasp development and on the reproductive fitness of wasp-attacked fly survivors.  
619 *Evol Ecol.* 2011;25:1065–79.
- 620 58. Moran NA, von Dohlen CD, Baumann P. Faster evolutionary rates in endosymbiotic bacteria  
621 than in cospeciating insect hosts. *J Mol Evol.* 1995;41:727–31.
- 622 59. Moran NA, McCutcheon JP, Nakabachi A. Genomics and evolution of heritable bacterial  
623 symbionts. *Annu Rev Genet.* 2008;42:165–90.
- 624 60. Delaney NF, Balenger S, Bonneaud C, Marx CJ, Hill GE, Ferguson-Noel N, et al. Ultrafast  
625 evolution and loss of CRISPRs following a host shift in a novel wildlife pathogen, *Mycoplasma*  
626 *gallisepticum*. *PLoS Genet.* 2012;8:e1002511.
- 627 61. Bennett GM, McCutcheon JP, McDonald BR, Moran NA. Lineage-specific patterns of  
628 genome deterioration in obligate symbionts of sharpshooter leafhoppers. *Genome Biol Evol.*  
629 2016;8:296–301.
- 630 62. Mouches C, Bové JM, Albisetti J. Pathogenicity of *Spiroplasma apis* and other spiroplasmas  
631 for honey-bees in Southwestern France. *Ann l'Institut Pasteur / Microbiol.* 1984;135:151–5.
- 632 63. Seemüller E, Garnier M, Schneider B. Mycoplasmas of Plants and Insects. In: *Molecular*  
633 *Biology and Pathogenicity of Mycoplasmas.* Boston, MA: Springer US; 2002. p. 91–115.
- 634 64. Krehenwinkel H, Kennedy S, Pekár S, Gillespie RG. A cost-efficient and simple protocol to  
635 enrich prey DNA from extractions of predatory arthropods for large-scale gut content analysis by  
636 Illumina sequencing. *Methods Ecol Evol.* 2017;8:126–34.
- 637 65. Wood SF. Importance of feeding and defecation times of insect vectors in transmission of  
638 Chagas' disease. *J Econ Entomol.* 1951;44:52–4.
- 639 66. Werren JH, Zhang W, Guo LR. Evolution and phylogeny of *Wolbachia*: reproductive  
640 parasites of arthropods. *Proc R Soc London Ser B Biol Sci.* 1995;261:55–63.
- 641 67. Williamson DL, Sakaguchi B, Hackett KJ, Whitcomb RF, Tully JG, Carle P, et al.  
642 *Spiroplasma poulsonii* sp. nov., a new species associated with male- lethality in *Drosophila*  
643 *willistoni*, a neotropical species of fruit fly. *Int J Syst Bacteriol.* 1999;49:611–8.

- 644 68. Sakaguchi B, Poulson DF. Distribution of “sex-ratio” agent in tissues of *Drosophila willistoni*.  
645 Genetics. 1961;46:1665–76.
- 646 69. Wright S, Goodacre SL. Evidence for antimicrobial activity associated with common house  
647 spider silk. BMC Res Notes. 2012;5:326.
- 648 70. White JA, Styer A, Rosenwald LC, Curry MM, Welch KD, Athey KJ, et al. Endosymbiotic  
649 bacteria are prevalent and diverse in agricultural spiders. Microb Ecol. 2019.
- 650 71. Zhang L, Zhang G, Yun Y, Peng Y. Bacterial community of a spider, *Marpiss magister*  
651 (Salticidae). 3 Biotech. 2017;7.
- 652 72. Becker H. Verhaltensbiologie der Wespenspinne. Biol unserer Zeit. 1981;11:86–90.
- 653 73. Wilson RS. The control of dragline spinning in the garden spider. J Cell Sci. 1962;104:557–  
654 71.
- 655 74. Vollrath F, Knight DP, Hu XW. Silk production in a spider involves acid bath treatment. Proc  
656 R Soc London Ser B Biol Sci. 1998;265:817–20.
- 657 75. Vollrath F, Porter D. Spider silk as archetypal protein elastomer. Soft Matter. 2006;2:377.
- 658 76. Ko FK, Wan LY. Engineering properties of spider silk. In: Handbook of Properties of Textile  
659 and Technical Fibres. 2nd edition. Woodhead Publishing; 2018. p. 185–220.
- 660 77. Urich T, Lanzén A, Qi J, Huson DH, Schleper C, Schuster SC. Simultaneous assessment of  
661 soil microbial community structure and function through analysis of the meta-transcriptome.  
662 PLoS One. 2008;3:e2527.
- 663 78. Walters W, Hyde ER, Berg-Lyons D, Ackermann G, Humphrey G, Parada A, et al. Improved  
664 Bacterial 16S rRNA Gene (V4 and V4-5) and Fungal Internal Transcribed Spacer Marker Gene  
665 Primers for Microbial Community Surveys. mSystems. 2016;1:e00009-15.
- 666 79. Sahlin K, Tomaszewicz M, Makova KD, Medvedev P. Deciphering highly similar multigene  
667 family transcripts from Iso-Seq data with IsoCon. Nat Commun. 2018;9:4601.
- 668 80. Callahan BJ, Mcmurdie PJ, Rosen MJ, Han AW, Johnson AJA, Holmes SP. DADA2: high-  
669 resolution sample inference from illumina amplicon data. Nat Methods. 2016;13:581–3.



- 670 81. R Core Team. R: A language and environment for statistical computing. 2017.
- 671 82. Wang Q, Garrity GM, Tiedje JM, Cole JR. Naïve Bayesian classifier for rapid assignment of  
672 rRNA sequences into the new bacterial taxonomy. *Appl Environ Microbiol.* 2007;73:5261–7.
- 673 83. Pruesse E, Quast C, Knittel K, Fuchs BM, Ludwig W, Rg Peplies J, et al. SILVA: a  
674 comprehensive online resource for quality checked and aligned ribosomal RNA sequence data  
675 compatible with ARB. *Nucleic Acids Res.* 2007;35:7188–96.
- 676 84. Wickham H. *ggplot2: Elegant Graphics for Data Analysis*. New York: Springer-Verlag New  
677 York; 2016.
- 678 85. Oksanen J, Blanchet G, Friendly M, Kindt R, Legendre P, McGlinn D, et al. *vegan:*  
679 *Community Ecology Package*. 2018.
- 680 86. Kumar S, Stecher G, Li M, Knyaz C, Tamura K. MEGA X: Molecular evolutionary genetics  
681 analysis across computing platforms. *Mol Biol Evol.* 2018;35:1547–9.
- 682 87. Thompson JD, Higgins DG, Gibson TJ. CLUSTAL W: improving the sensitivity of  
683 progressive multiple sequence alignment through sequence weighting, position-specific gap  
684 penalties and weight matrix choice. *Nucleic Acids Res.* 1994;22:4673–80.
- 685 88. Nguyen L-T, Schmidt HA, Haeseler A von, Minh BQ. IQ-TREE: A Fast and Effective  
686 Stochastic Algorithm for Estimating Maximum-Likelihood Phylogenies. *Mol Biol Evol.*  
687 2015;32:268.
- 688 89. Rambaut A, Drummond A. *FigTree: Tree figure drawing tool*. 2018.
- 689
